# Supplementary material for: Mechanism of general acid–base catalysis in transesterification of an RNA model phosphodiester studied with strongly basic catalysts
Source: Royal Society of Chemistry journal article supplement (doi:10.1039/b920398b), 2009-12-21
Supplement: b920398b.pdf [file b920398b.pdf]

## Supplementary Information

### Mechanism of general acid-base catalysis in the cleavage of an RNA model phosphodiester studied with strongly basic catalysts

David O. Corona-Martínez, Olga Taran and Anatoly K. Yatsimirsky

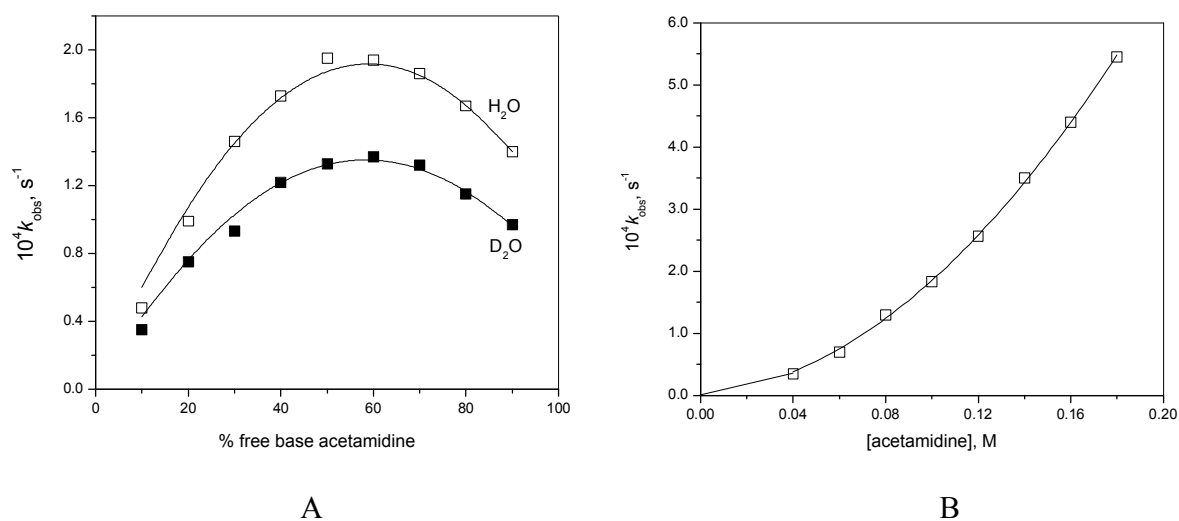

**Figure S1.** Catalysis of the hydrolysis of HPNP by 0.1 M acetamidine as a function of the fraction of free base (A) and as a function of total buffer concentration at 50% free base (B) in 80% vol DMSO, 37°C. Open symbols – results in DMSO/H<sub>2</sub>O, solid symbols – results in DMSO/D<sub>2</sub>O. Lines are calculated in accordance with equation (2).

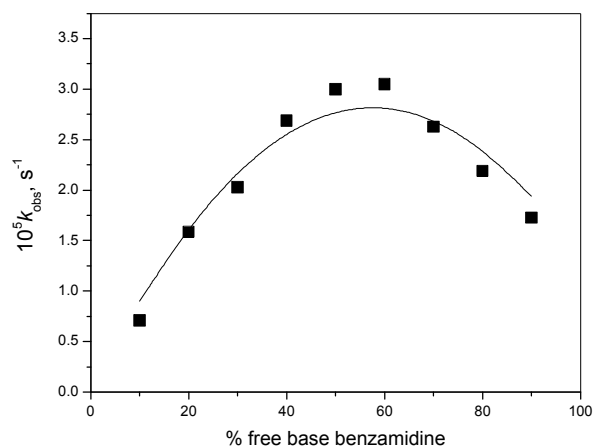

**Figure S2.** Catalysis of the hydrolysis of HPNP by 0.1 M benzamidine as a function of the fraction of free base) in 80% vol DMSO, 37°C. The line is calculated in accordance with equation (2).

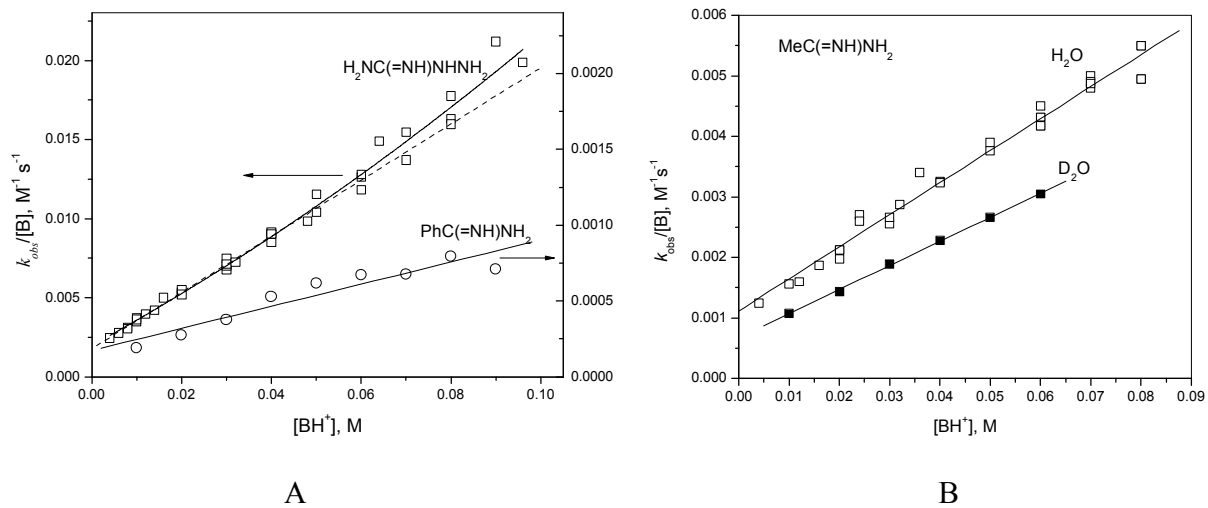

**Figure S3.** Results for catalysis of transesterification of HPNP by aminoguanidine, benzamidine (A) and acetamidine (B) in coordinates of equation (3). Open symbols – results in DMSO/H<sub>2</sub>O, solid symbols – results in DMSO/D<sub>2</sub>O.

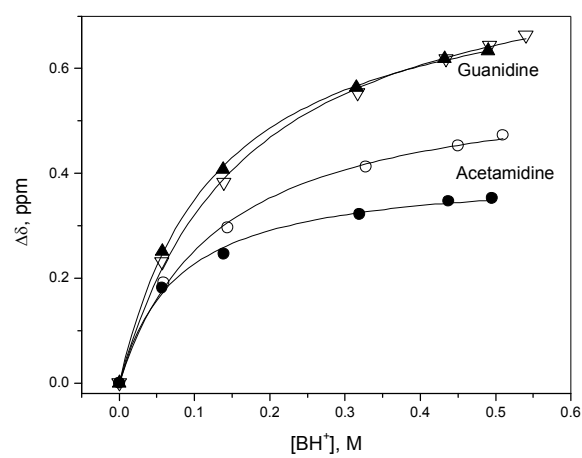

**Figure S4.** <sup>31</sup>P NMR titration of 0.01 M diphenylphosphate by guanidinium or acetamidinium chlorides in DMSO-d<sub>6</sub>/H<sub>2</sub>O (open symbols) or DMSO-d<sub>6</sub>/D<sub>2</sub>O (solid symbols).
